# Supplementary material
Source: PubMed Central journal article supplement (PMC6870054)
Supplement: HBM-33-1700-s001.pdf [file HBM-33-1700-s001.pdf]

Brain systems for baroreflex suppression

## Supporting Information

Brain systems for baroreflex suppression during stress in humans

Peter J. Gianaros<sup>1†</sup>, Ikechukwu C. Onyewuenyi<sup>2</sup>, Lei K. Sheu<sup>1</sup>, Israel C. Christie<sup>1</sup>, and Hugo D. Critchley<sup>3,4,5</sup>

<sup>1</sup>Department of Psychiatry, University of Pittsburgh, 3811 O'Hara Street, Pittsburgh, PA 15213.

<sup>2</sup>Department of Psychology, University of Pittsburgh, 15260, Pittsburgh, PA. <sup>3</sup>Department of Psychiatry, Brighton and Sussex Medical School, University of Sussex Campus, Falmer, Brighton BN1 3AR, UK. <sup>4</sup>Sackler Centre for Consciousness Science, University of Sussex. <sup>5</sup>Sussex Partnership NHS Foundation Trust

Brain systems for baroreflex suppression

**Table S1**

Brain areas where greater relative BOLD activation identified by the 'Incongruent > Congruent' condition contrast covaried with a greater decrease in baroreflex sensitivity in a whole-brain and exploratory multiple regression analysis with covariate control for age, sex, and resting baroreflex sensitivity.

| Side | Region                               | BA         | MNI coordinates (peak) |     |     | t-value | voxels |
|------|--------------------------------------|------------|------------------------|-----|-----|---------|--------|
|      |                                      |            | x                      | y   | z   |         |        |
| L/R  | Perigenual anterior cingulate cortex | 32         | 0                      | 44  | -4  | 3.98    | 237    |
|      | Medial prefrontal cortex             | 10         | 6                      | 58  | -6  | 4.44    |        |
| R    | Subgenual anterior cingulate cortex  | 25         | 4                      | 18  | -10 | 4.13    | 61     |
| L/R  | Dorsal anterior cingulate cortex     | 32, 33, 24 | 4                      | 28  | 24  | 4.90    | 446    |
| R    | Posterior mid-cingulate cortex       | 24,6       | 10                     | -4  | -44 | 4.24    | 85     |
| L/R  | Posterior mid-cingulate cortex       | 24         | 6                      | -6  | -28 | 3.80    | 106    |
| L/R  | Posterior cingulate cortex           | 29, 30     | -2                     | -44 | 20  | 4.04    | 112    |
| L    | Posterior insula                     | 13         | -44                    | -24 | -6  | 4.12    | 1816   |
| R    | Postcentral gyrus                    | 43         | 62                     | -8  | 16  | 4.94    | 1503   |
| R    | Superior temporal gyrus              | 38         | 40                     | 2   | -18 | 4.08    | 59     |
| R    | Post-central gyrus,                  | 2          | 36                     | -28 | 38  | 4.73    | 988    |
|      | Pre-central gyrus                    | 3          | 26                     | -28 | 56  | 4.46    |        |
|      |                                      | 4          | 48                     | -14 | 38  | 4.50    |        |
| L    | Posterior insula                     | 13         | -38                    | -36 | 20  | 4.51    | 149    |
| R    | Amygdala                             |            | 20                     | -2  | -22 | 4.42    | 58     |
| L    | Hippocampus                          | 28,35      | -26                    | -24 | -14 | 4.32    | 131    |
| R    | Fusiform gyrus,                      | 37         | 42                     | -38 | -8  | 4.16    | 205    |
|      | Parahippocampal gyrus                |            |                        |     |     |         |        |
| L    | Thalamus                             |            | -8                     | -32 | 10  | 4.23    | 156    |
| R    | Thalamus                             |            | 8                      | -32 | 8   | 3.72    | 146    |
| R    | Thalamus                             |            | 8                      | -8  | 16  | 3.56    | 111    |
| R    | Caudate nucleus,                     |            | 18                     | 22  | 0   | 3.76    | 92     |
|      | Putamen                              |            |                        |     |     |         |        |
| R    | Inferior parietal lobule             | 40         | 56                     | 28  | 40  | 4.03    | 62     |
| L    | Cuneus                               | 18         | -22                    | -68 | 20  | 3.96    | 88     |
| L    | Inferior frontal gyrus               | 45         | -50                    | 28  | -2  | 3.77    | 305    |
| R    | Middle frontal gyrus                 | 6          | 38                     | 14  | 48  | 3.70    | 97     |
| L    | Middle temporal gyrus                | 19,39      | -36                    | -56 | 2   | 3.68    | 64     |

**Note.** Next to each left (L) and right (R) region and approximate Brodmann area (BA) are the MNI coordinates (for the peak voxel in each cluster), where x = right (+) to left (-); y = anterior (+) to posterior (-); z = superior (+) to inferior (-). T-values for voxels of peak activation and their corresponding cluster extents were derived from a mixed-effects analysis employing a height threshold of  $P < 0.001$  and extent cluster threshold of  $k = 50$  voxels (see Figure S3).

Brain systems for baroreflex suppression

**Table S2**

(a) Brain areas exhibiting relative BOLD activation identified by the 'Incongruent > Congruent' condition contrast in a random-effects model.

| Side | Region                               | BA | MNI coordinates (peak) |     |     | t-value | voxels |
|------|--------------------------------------|----|------------------------|-----|-----|---------|--------|
|      |                                      |    | x                      | y   | z   |         |        |
| L/R  | Dorsal mid-anterior cingulate cortex | 24 | -8                     | 14  | 44  | 10.07   | 10627  |
|      | Superior frontal gyrus               | 6  | 6                      | 12  | 48  | 10.60   |        |
|      | Pre-central gyrus                    | 6  | -44                    | 4   | 28  | 10.32   |        |
|      | Anterior insula                      | 13 | -32                    | 20  | 4   | 7.49    |        |
|      | Anterior insula                      | 13 | 34                     | 24  | 0   | 5.61    |        |
| L/R  | Precuneus                            | 7  | -8                     | -74 | 50  | 9.76    | 13805  |
|      | Angular gyrus                        | 39 | -32                    | -54 | 46  | 9.50    |        |
|      | Cerebellum                           |    | -34                    | -70 | -24 | 9.68    |        |
| L/R  | Thalamus                             |    | -12                    | -16 | 6   | 7.15    | 1023   |
|      |                                      |    | 8                      | -14 | 8   | 6.17    |        |

(b) Brain areas exhibiting BOLD relative deactivation identified by 'Congruent > Incongruent' condition contrast in a random-effects model

|     |                                                |        |     |     |     |       |      |
|-----|------------------------------------------------|--------|-----|-----|-----|-------|------|
| L/R | Posterior cingulate                            | 31, 23 | -6  | -40 | 34  | 10.2  | 5862 |
|     | Amygdala, hippocampus                          | 28     | -22 | -20 | -24 | 8.56  |      |
| L/R | Perigenual/subgenual anterior cingulate cortex | 32     | -2  | 46  | -18 | 9.90  | 4106 |
|     | Orbitomedial prefrontal cortex                 | 24     | -4  | 30  | -12 | 8.33  |      |
|     |                                                | 25     | 0   | 18  | -10 | 7.43  |      |
| L   | Posterior insula                               | 13     | -38 | -18 | 18  | 8.85  | 1227 |
|     | Middle temporal gyrus                          | 21     | -46 | 4   | -34 | 5.20  |      |
| R   | Posterior insula                               | 13     | 38  | -18 | -16 | 7.5   | 1607 |
| L   | Superior frontal gyrus                         | 8      | -24 | 32  | 48  | 8.25  | 1057 |
| L   | Angular gyrus, middle temporal gyrus           | 39     | -46 | -72 | 36  | 10.67 | 735  |
| R   | Parahippocampal gyrus                          | 34     | 20  | -14 | -24 | 6     | 59   |
| R   | Superior and middle frontal gyrus              | 8      | 20  | 40  | 50  | 6.20  | 487  |
|     |                                                | 6      | 26  | 32  | 52  | 5.43  |      |
| L/R | Paracentral lobule                             | 4      | 14  | -34 | 68  | 4.49  | 307  |
|     |                                                | 5      | -4  | 32  | 60  | 3.87  |      |
|     |                                                | 6      | 8   | -22 | 68  | 4.11  |      |

**Note.** Next to each left (L) and right (R) region and approximate Brodmann area (BA) are the MNI coordinates (for the peak voxel in each cluster), where x = right (+) to left (-); y = anterior (+) to posterior (-); z = superior (+) to inferior (-). T-values for voxels of peak activation / relative deactivation and their corresponding cluster extents were derived from a random-effects analysis employing a false detection rate of 0.05, based on Monte Carlo simulations (see Materials and Methods and Figure S4). For each contrast, these height and extent thresholds corresponded to  $P < 0.001$  and  $k = 206$  voxels.

Brain systems for baroreflex suppression

**Table S3**

(a) Areas showing significantly greater functional connectivity with a perigenual anterior cingulate cortex seed during the performance of the incongruent condition of the MSIT (see Figure S5)

| Side | Region                                  | BA     | MNI Coordinates |     |     | t-value | Voxels |
|------|-----------------------------------------|--------|-----------------|-----|-----|---------|--------|
|      |                                         |        | x               | y   | z   |         |        |
| L    | Superior/middle frontal gyrus           | 10     | 16              | 40  | -14 | 5.40    | 5741   |
| R    | Superior/middle frontal gyrus           | 10     | -18             | 56  | -8  | 4.60    |        |
| R    | Inferior/middle frontal gyrus           | 47     | 46              | 38  | -6  | 4.29    |        |
| L    | Inferior/middle frontal gyrus           | 46, 47 | -50             | 28  | 24  | 3.86    |        |
|      |                                         |        | -18             | 36  | -14 | 5.26    |        |
| L    | Subgenual/perigenual anterior cingulate |        | -8              | 32  | -2  | 4.22    |        |
| R    | Subgenual/perigenual anterior cingulate |        | 8               | 34  | -6  | 4.05    |        |
| L/R  | Caudate head                            |        | -16             | 26  | -12 | 4.64    |        |
| R    | Midbrain                                |        | 12              | -16 | -6  | 4.07    |        |
| L    | Midbrain                                |        | -8              | -16 | -8  | 3.57    |        |
| R    | Thalamus                                |        | 6               | -6  | 14  | 3.73    |        |
| L    | Globus pallidus                         |        | -14             | -4  | -2  | 4.51    |        |
| L    | Caudate body                            |        | -6              | 14  | 4   | 4.31    |        |
| R    | Caudate body                            |        | 8               | 14  | 6   | 4.09    |        |
| L    | Pre-central gyrus                       | 4      | -40             | -16 | 36  | 3.20    | 281    |
| L    | Inferior parietal lobule                | 40     | -36             | -34 | 30  | 3.14    |        |
| R    | Inferior temporal gyrus, Fusiform gyrus | 37     | 56              | -58 | -4  | 4.18    | 152    |
| R    | Pre-central gyrus                       | 6      | 44              | 32  | 18  | 4.17    | 1451   |
| R    | Medial frontal gyrus                    | 6      | 16              | 8   | 54  | 4.15    | 127    |
| R    | Inferior parietal lobule                | 40     | -38             | -50 | 40  | 3.92    | 711    |
| L    | Posterior cingulate gyrus               | 31     | -16             | -28 | 36  | 3.53    |        |
| L    | Caudate Tail                            |        | 38              | -36 | 8   | 3.78    | 70     |
| R    | Posterior cingulate gyrus               | 31     | 18              | -26 | 46  | 3.60    | 54     |
| R    | Precuneus                               | 7      | 10              | -50 | 54  | 3.36    | 59     |

(b) Areas showing significantly greater functional connectivity with an amygdala seed during the performance of the incongruent condition of the MSIT (see Figure S6)

|     |                                |           |     |     |     |      |      |
|-----|--------------------------------|-----------|-----|-----|-----|------|------|
| R   | Inferior/middle temporal gyrus | 37        | 48  | -44 | -6  | 4.71 | 2611 |
| L   | Anterior insula                | 13        | -32 | 16  | 14  | 3.94 |      |
| L   | Putamen                        |           | -20 | 8   | 12  | 4.1  |      |
| R   | Parahippocampal gyrus          | 35,28, 34 | 32  | -30 | -24 | 4.36 |      |
| L/R | Thalamus                       |           | 2   | -4  | 2   | 3.97 |      |

Brain systems for baroreflex suppression

|     |                           |        |     |     |     |      |     |
|-----|---------------------------|--------|-----|-----|-----|------|-----|
| R   | Thalamus                  |        | 18  | -16 | 6   | 3.72 |     |
| L/R | Cerebellum                |        | -16 | -50 | -10 | 4.11 | 766 |
| R   | Hippocampus               |        | 32  | -38 | -4  | 3.31 |     |
| L   | Medial globus pallidus    |        | -10 | 0   | -4  | 3.95 |     |
| R   | Lateral globus pallidus   |        | 26  | -18 | -6  | 3.42 |     |
| L/R | Midbrain                  |        | 4   | -30 | -18 | 3.22 |     |
| L   | Pons                      |        | -12 | -16 | -26 | 3.74 |     |
| L   | Fusiform gyrus            | 20     | -46 | -8  | -26 | 4.02 | 651 |
| L   | Sub-Gyral                 | 21     | -46 | -18 | -16 | 4.02 |     |
| L   | Caudate Tail              |        | -34 | -16 | -12 | 3.92 |     |
| L   | Thalamus                  |        | -20 | -8  | 14  | 3.92 | 126 |
| R   | Thalamus                  |        | 4   | -24 | 16  | 3.7  | 95  |
| L   | Posterior insula          | 13     | -34 | -22 | 22  | 3.84 | 178 |
| L   | Pre-central gyrus         | 6      | -42 | -6  | 26  | 3.17 |     |
| R   | Caudate body              |        | -24 | -20 | 26  | 3.02 |     |
| R   | Occipital Lobe            | 19     | 32  | -70 | -2  | 3.73 | 50  |
| R   | Middle temporal gyrus     | 22     | 46  | -20 | -10 | 3.71 | 67  |
| L   | Caudate body              |        | -8  | -6  | 20  | 3.11 |     |
| L   | Precuneus                 | 31     | -18 | -40 | 34  | 3.56 | 181 |
| L   | Posterior cingulate gyrus | 31     | -22 | -50 | 30  | 3.52 |     |
| L   | Caudate Tail              |        | -20 | -30 | 26  | 3.06 |     |
| R   | Putamen                   |        | 26  | 14  | 6   | 3.03 | 55  |
| R   | Hypothalamus              |        | 10  | -2  | -12 | 3.09 | 50  |
| R   | Amygdala                  |        | 34  | -2  | -28 | 3.52 | 55  |
| R   | Posterior cingulate gyrus | 31     | 24  | -34 | 28  | 3.45 | 63  |
| L   | Superior temporal gyrus   | 39, 22 | -46 | -50 | 24  | 3.38 | 127 |
| L   | Middle temporal gyrus     | 19     | -34 | -60 | 14  | 3.29 |     |

(c) Areas showing significantly greater functional connectivity with a left anterior insula seed during the performance of the incongruent condition of the MSIT (see Figure S7)

|   |                                      |            |     |     |     |      |      |
|---|--------------------------------------|------------|-----|-----|-----|------|------|
| R | Middle temporal gyrus/Fusiform gyrus | 19, 20, 21 | 48  | -4  | -28 | 5.26 | 9120 |
| L | Middle temporal gyrus/Fusiform gyrus | 21, 37     | -50 | -2  | -24 | 3.8  |      |
| L | Insula/Inferior frontal gyrus        | 45, 47     | -34 | 18  | -16 | 4.5  |      |
| R | Insula/Inferior frontal gyrus        | 47         | 38  | 18  | -16 | 3.41 |      |
| R | Parahippocampal gyrus                | 28, 34     | 30  | -20 | -24 | 4.3  |      |
| L | Parahippocampal gyrus                | 28, 34     | -22 | -24 | -26 | 3.81 |      |

Brain systems for baroreflex suppression

|     |                                |        |     |     |     |      |     |
|-----|--------------------------------|--------|-----|-----|-----|------|-----|
| L/R | Cerebellum                     |        | 46  | -58 | -24 | 4.43 |     |
| R   | Pons                           |        | 6   | -22 | -32 | 4.44 |     |
| L   | Midbrain (PAG)                 |        | -14 | -28 | -6  | 4.15 |     |
| L   | Postcentral gyrus              | 2,3    | -32 | -22 | 46  | 4.43 | 422 |
| R   | Postcentral gyrus              | 2      | 46  | -22 | 26  | 3.33 | 53  |
| R   | Insula/Superior temporal gyrus | 13, 22 | 42  | -42 | 22  | 4.3  | 176 |
| L   | Cingulate gyrus/Precuneus      | 31     | -10 | -50 | 38  | 3.88 | 591 |
| R   | Angular gyrus                  | 39     | 36  | -64 | 22  | 4.08 | 165 |
| L   | Middle occipital gyrus         | 18, 19 | -24 | -88 | 0   | 3.73 | 81  |
| L   | Medial globus pallidus         |        | -12 | 0   | -2  | 3.67 | 212 |
| L   | Caudate Body                   |        | -12 | 4   | 8   | 3.52 |     |
| L   | Thalamus                       |        | -16 | -4  | 14  | 3.3  |     |
| L   | Thalamus                       |        | -16 | -4  | 14  | 3.3  |     |

(d) Areas showing significantly greater functional connectivity with a dorsal anterior cingulate seed during the performance of the incongruent condition of the MSIT (see Figure S8)

|   |                                   |    |     |     |     |      |     |
|---|-----------------------------------|----|-----|-----|-----|------|-----|
| L | Middle frontal gyrus (DLPFC)      | 46 | -48 | 32  | 22  | 4.78 | 762 |
| R | Inferior frontal gyrus(DLPFC)     | 46 | 36  | 12  | 22  | 4.25 | 159 |
| R | Superior frontal gyrus            | 9  | 16  | 48  | 28  | 4.24 | 334 |
| R | Middle frontal gyrus (DLPFC)      | 46 | 44  | 28  | 20  | 4.17 | 278 |
| L | Medial frontal gyrus              | 9  | -8  | 42  | 30  | 3.92 | 72  |
| R | Orbitofrontal cortex              | 11 | 40  | 38  | -12 | 3.65 | 65  |
| L | Rostral anterior cingulate cortex | 32 | -8  | 30  | 40  | 3.57 | 87  |
| R | Superior frontal gyrus            | 8  | 38  | 14  | 54  | 3.46 | 169 |
| R | Inferior parietal cortex          | 40 | 36  | -56 | 48  | 3.38 | 103 |
| L | Posterior insula                  | 13 | -32 | -18 | 26  | 3.18 | 84  |

Note. Next to each left (L) and right (R) region and approximate Brodmann area (BA) are the MNI coordinates of the peak voxel in the cluster, where x = right (+) to left (-); y = anterior (+) to posterior (-); z = superior (+) to inferior (-). T-values for voxels of peak connectivity and their corresponding cluster extents were derived from a random-effects analysis employing a family-wise error rate corrected threshold of  $P < 0.005$  with an extent threshold of  $k = 50$  voxels.

## Brain systems for baroreflex suppression

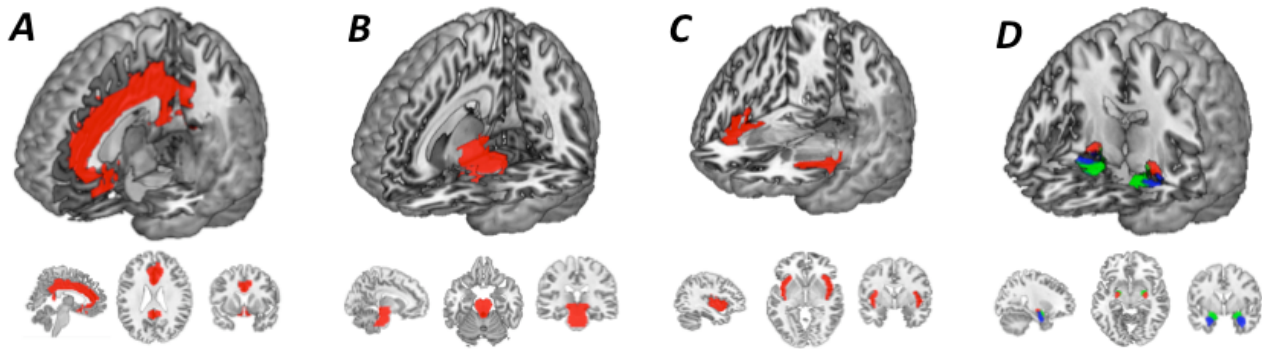

**Figure S1.** Region-of-interest (ROI) analyses were executed for tests of the covariation between the change in baroreflex sensitivity from baseline to the multi-source interference stressor task and individual differences in the activation and functional connectivity of the cingulate, midbrain/pons, insula, and amygdala. **A-D**, Illustrations of anatomical masks used for ROI analyses: **A**: cingulate, **B**: midbrain/pons, **C**: insula, **D**: combined subregions of the amygdala (red: corticomedial [CM]; blue: superficial [SF]; green: basolateral [BL]). ROIs for the cingulate, midbrain/pons, and insula were created using the Talairach Daemon database (Lancaster et al., 1997), as implemented in the WFU Pick-Atlas Toolbox (Maldjian et al., 2003). The amygdala ROI was created using the SPM Anatomy toolbox, combining the SF, CM and BL subregions (Eickhoff et al., 2005). The dimensions for the cingulate ROI had center of mass of  $x = 1$ ,  $y = 1$ , and  $z = 28$ . It extended along the  $x$ -  $y$ - and  $z$ - directions from a minimum (min)  $x$  coordinate of  $-16\text{mm}$  to a maximum (max)  $x$ -coordinate of  $18\text{mm}$ ; a min  $y$  of  $-58\text{mm}$  to a max  $y$  of  $54\text{mm}$ ; a min  $z$  of  $-20\text{mm}$  to a max  $z$  of  $54\text{mm}$ . It had a volume of  $62808\text{mm}^3$ . The combined midbrain and pons ROI had center of mass of  $0$ ,  $-25$ ,  $-22$ , and it extended from a min  $x$  of  $-22\text{mm}$  to a max  $x$  of  $24\text{mm}$ , a min  $y$  of  $-44\text{mm}$  to a max  $y$  of  $-4\text{mm}$ , and a min  $z$  of  $-42\text{mm}$  to a max  $z$  of  $0\text{mm}$ . Its volume was  $23160\text{mm}^3$ . The insula and amygdala ROIs were bilateral. The left insula ROI was centered at  $-35$ ,  $5$ ,  $2$ , and it extended from a min  $x$  of  $-48\text{mm}$  to a max  $x$  of  $-24\text{mm}$ , a min  $y$  of  $-32\text{mm}$  to a max  $y$  of  $32\text{mm}$ , and a min  $z$  of  $-20\text{mm}$  to a max  $z$  of  $22\text{mm}$ . The right insula had center of mass at  $39$ ,  $5$ ,  $1$ , and it extended from a min  $x$  of  $26\text{mm}$  to a max  $x$  of  $50\text{mm}$ , a min  $y$  of  $-30\text{mm}$  to a max  $y$  of  $32\text{mm}$ , and a min  $z$  of  $-20\text{mm}$  to a max  $z$  of  $22\text{mm}$ . The total volume of the insula ROI was  $28664\text{mm}^3$ . The left amygdala ROI had a center of mass at  $-23$ ,  $-6$ ,  $-16$ . It extended from a min  $x$  of  $-37\text{mm}$  to max  $x$  of  $-18\text{mm}$ , a min  $y$  of  $-15\text{mm}$  to a max  $y$  of  $3\text{mm}$ , and a min  $z$  of  $-36\text{mm}$  to a max  $z$  of  $-9\text{mm}$ . The right amygdala had center of mass at  $26$ ,  $-5$ ,  $-16$ . It extended from min  $x$  of  $21\text{mm}$  to a max  $x$  of  $41\text{mm}$ , a min  $y$  of  $-15\text{mm}$  to a max  $y$  of  $4\text{mm}$ , and a min  $z$  of  $-39\text{mm}$  to a max  $z$  of  $-10\text{mm}$ . The total volume of the amygdala ROI was  $6832\text{mm}^3$ . All masks are available on request.

To determine the covariation between (i) the change in BRS from baseline to task performance, (ii) MSIT-related activation and relative deactivation, as well as (iii) PPI functional connectivity at the group level, individual contrast maps (Incongruent vs. Congruent) and connectivity maps generated from seed regions (pACC, amygdala, and anterior insula) were submitted to general linear models in SPM8. For all analyses, we maintained a corrected false-discovery threshold of 0.05 within the volumes of all ROIs by employing voxel-wise and combined cluster extent thresholds determined by the spatial smoothness (in FWHM) and 2000 Monte Carlo simulations implemented in AlphaSim (Ward, 2000) Thresholds needed to account for multiple testing within the ROI volumes for each analysis are below.

| Analysis                                                                                       | ROI mask      | $P$ -value | Extent threshold |
|------------------------------------------------------------------------------------------------|---------------|------------|------------------|
| Covariation of fMRI BOLD signal change with $\Delta\text{BRS}$                                 | Cingulate     | 0.001      | 50               |
|                                                                                                | Insula        |            | 26               |
|                                                                                                | Amygdala      |            | 4                |
|                                                                                                | Midbrain/Pons |            | 19               |
| Connectivity with perigenual anterior cingulate cortex seed (MNI $x$ $y$ $z$ : $0$ $44$ $-4$ ) | Insula        | 0.001      | 47               |

## Brain systems for baroreflex suppression

|                                                                       |               |       |    |
|-----------------------------------------------------------------------|---------------|-------|----|
| Connectivity with right amygdala seed<br>(MNI x y z: -42 18 20)       | Insula        | 0.001 | 6  |
| Connectivity with left anterior insula seed<br>(MNI x y z: -30 14 14) | Midbrain/Pons | 0.001 | 19 |

---

## References

- Eickhoff S, Stephan KE, Mohlberg H, Grefkes C, Fink GR, Amunts K, Zilles K (2005): A new SPM toolbox for combining probabilistic cytoarchitectonic maps and functional imaging data. *NeuroImage* 25: 1325-1335.
- Lancaster JL, Summerlin JL, Rainey L, Freitas CS, Fox PT (1997): The Talairach Daemon, a database server for Talairach Atlas Labels. *NeuroImage* 5:S633.
- Maldjian JA, Laurienti PJ, Kraft RA, Burdette JH (2003): An automated method for neuroanatomic and cytoarchitectonic atlas-based interrogation of fMRI data sets. *NeuroImage* 19: 1233-1239.
- Ward BD (2000): Simultaneous inference for fMRI data: AFNI 3d Deconvolve documentation. Medical College of Wisconsin.: [http://afni.nimh.nih.gov/pub/dist/doc/program\\_help/3dDeconvolve.html](http://afni.nimh.nih.gov/pub/dist/doc/program_help/3dDeconvolve.html)



## Brain systems for baroreflex suppression

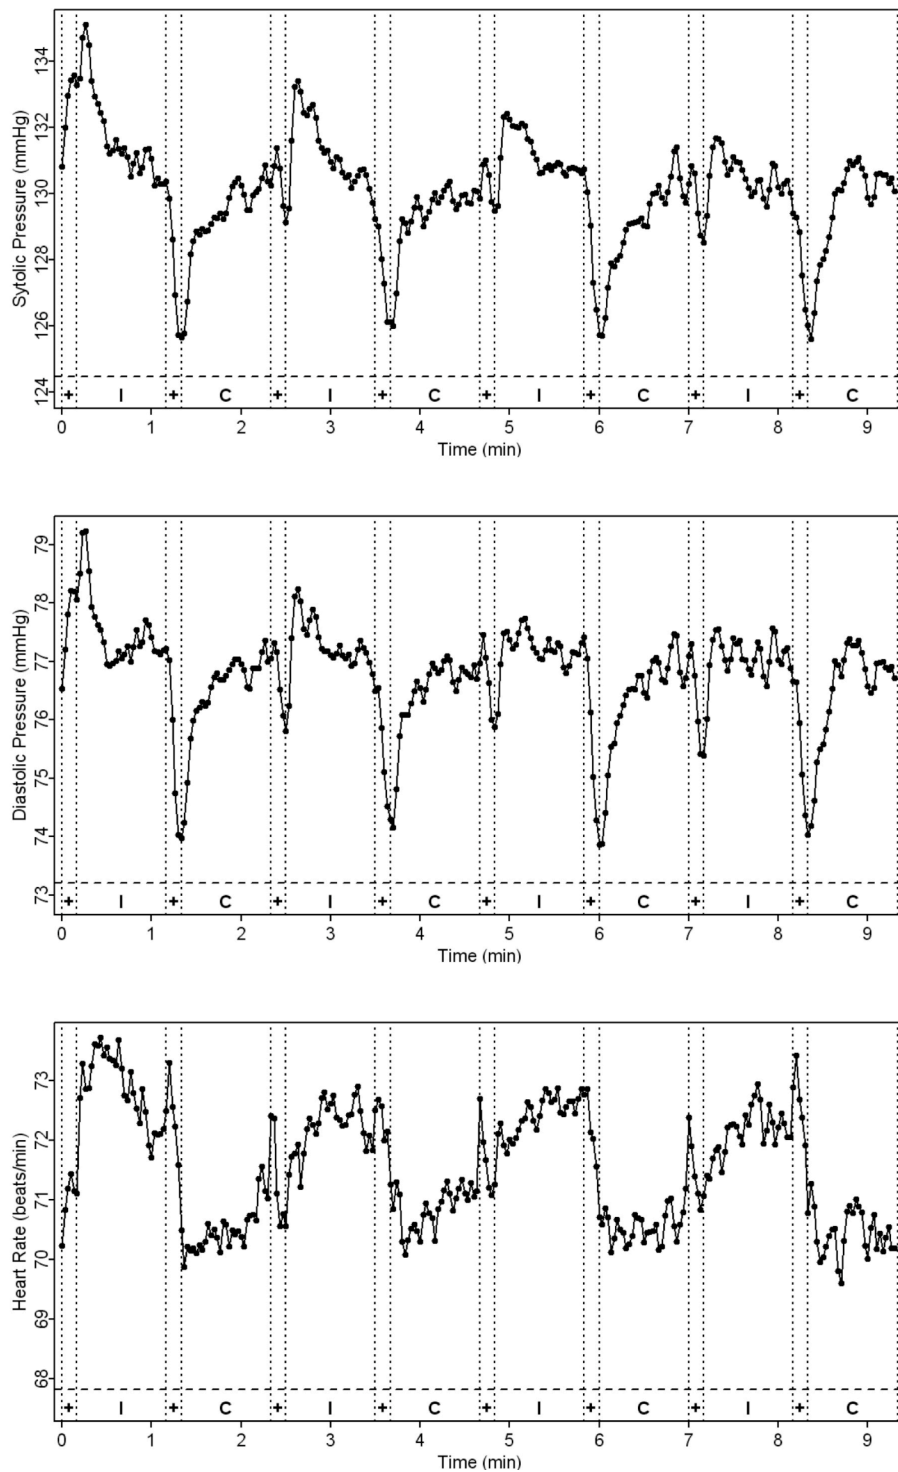

**Figure S2.** Average time-series for systolic and diastolic blood pressures, and heart rate across the multi-source interference task stressor epochs. Time series were re-sampled at 10Hz, starting at task onset in order to align to a commonly referenced time line across participants. Each time point represents the mean of a 2 sec, non-overlapping window. The dotted vertical lines delineate the fixation (+), congruent (C), and incongruent (I) task epochs. The dashed horizontal lines in each panel represent the mean from the last 5 min of the preceding baseline period for each variable. Random-effects models of epoch means showed that for each of the three variables: 1) levels during the fixation, congruent, and incongruent task epochs were significantly increased relative to baseline ( $t_s \geq 8.18$ ;  $P_s \leq 0.0001$ ); and 2) levels during the incongruent epochs were significantly greater than those of the congruent epochs ( $t_s \geq 2.5876$ ;  $P_s \leq 0.01$ ).

## Brain systems for baroreflex suppression

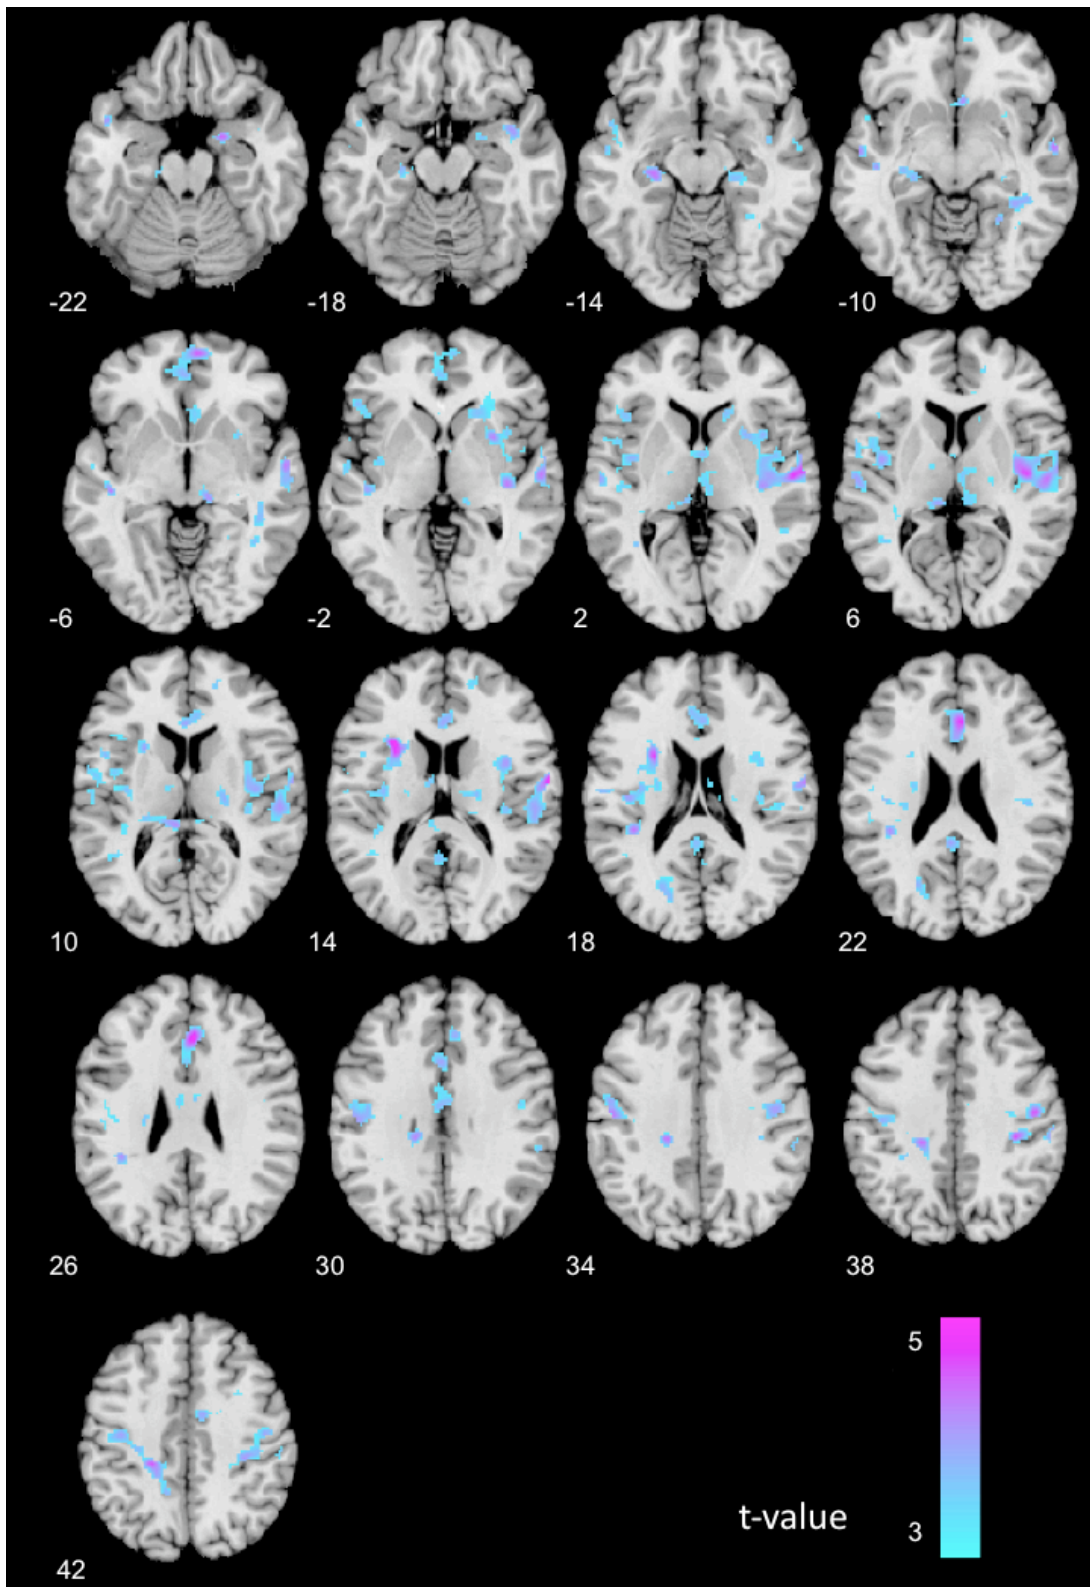

**Figure S3.** Whole-brain parametric map profiling areas where a greater stressor-evoked reduction in baroreflex sensitivity correlated with greater BOLD activation, as determined by the 'Incongruent > Congruent' contrast in multiple regression analyses. The map is thresholded at an uncorrected  $P < 0.001$  and  $k = 50$ . [Table S2](#) provides Brodmann areas, MNI coordinates, and  $t$ -values for voxels of peak activation (global maxima) profiled in this map. Values in the lower left corner of each slice correspond to  $z$  coordinates in MNI space.

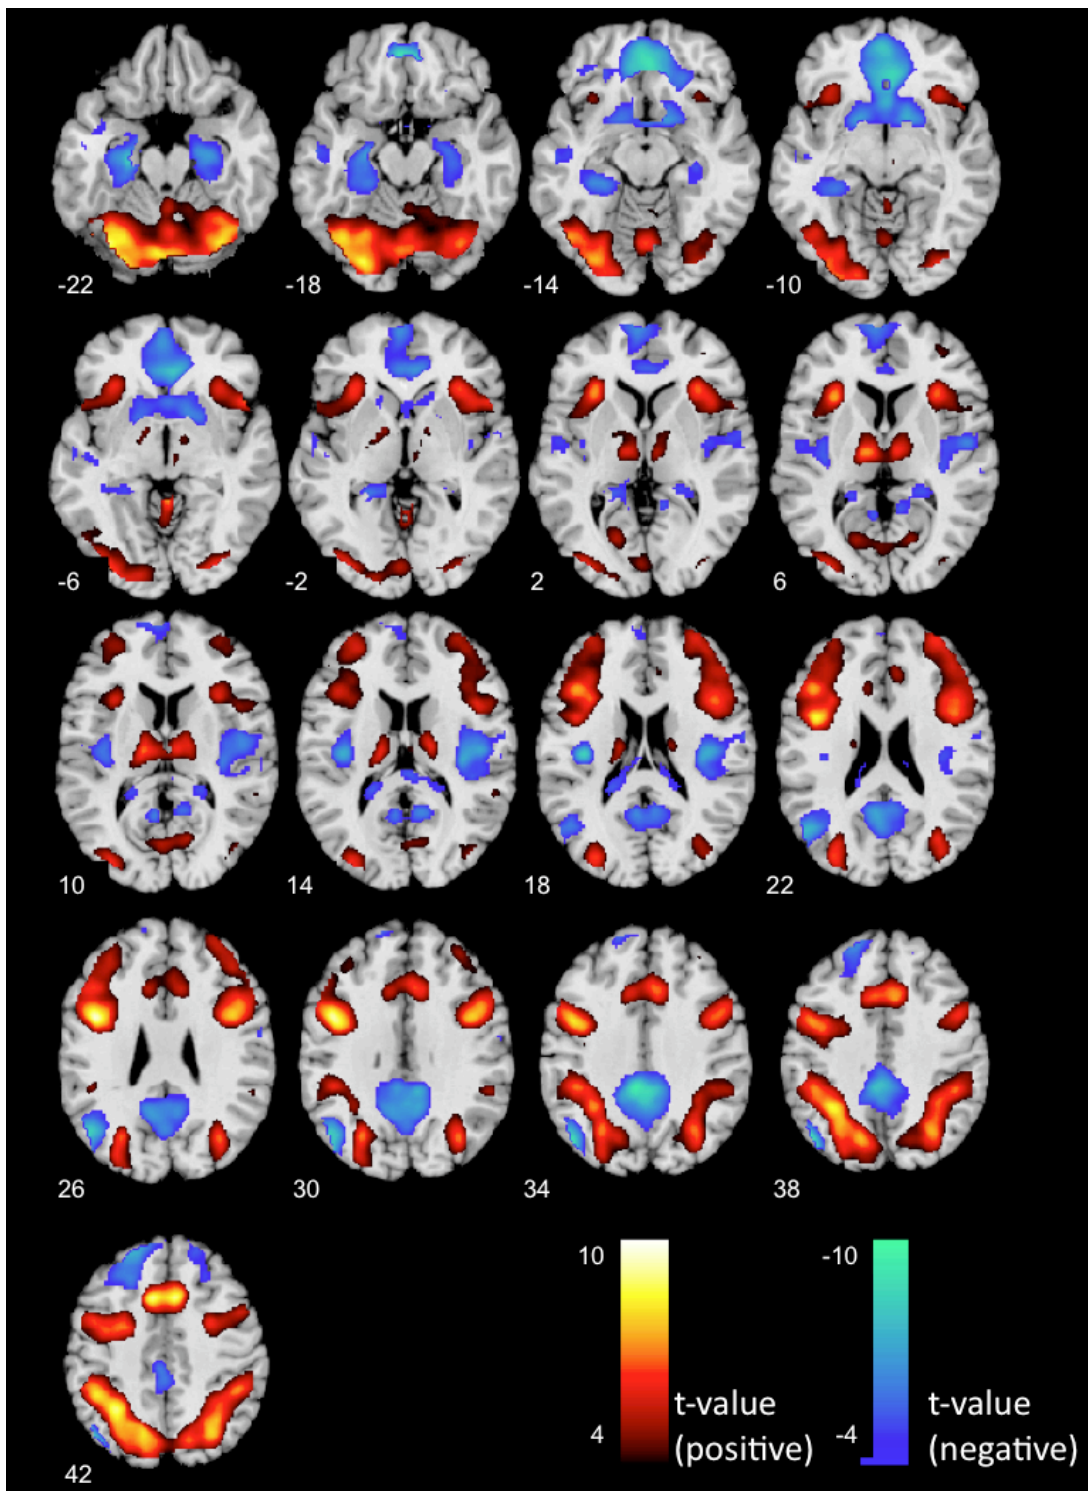

**Figure S4.** Parametric maps profiling areas of relative BOLD activation (red-yellow) and deactivation (blue-green) determined by the ‘Incongruent > Congruent’ and the ‘Congruent > Incongruent’ contrasts in whole-brain random-effects analyses, respectively. Maps are displayed at a corrected voxel-wise threshold of  $P < 0.05$ , determined by Monte Carlo simulations (see Materials and Methods). This threshold corresponded to a voxel-wise  $P < 0.001$  and combined cluster extent threshold of  $k > 206$ . [Table S3](#) provides Brodmann areas, MNI coordinates, and  $t$ -values for voxels of peak activation and deactivation (global maxima) profiled in these maps. Values in the lower left corner of each slice correspond to  $z$  coordinates in MNI space.

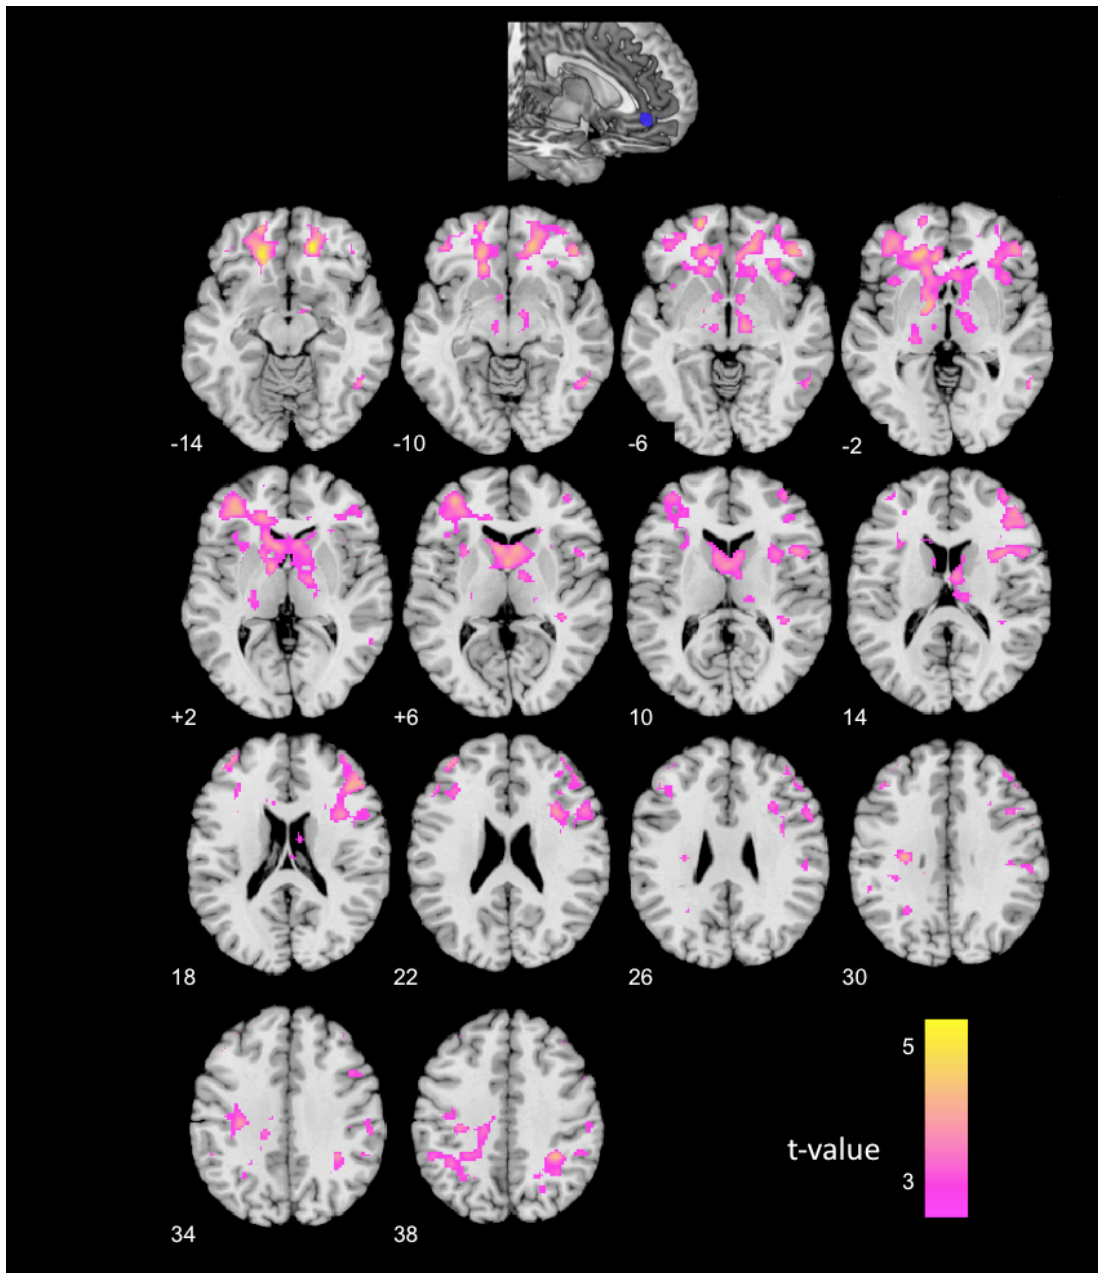

**Figure S5.** Whole-brain parametric map from a random-effects analysis profiling areas showing increased functional connectivity with a perigenual anterior cingulate cortex (pACC) seed (shown at top). For illustrative purposes, this whole-brain connectivity map is displayed at an uncorrected threshold of  $P < 0.005$  and a cluster extent of  $k > 50$  voxels. [Table S4\(a\)](#) provides Brodmann areas, MNI coordinates, and  $t$ -values for voxels of peak connectivity (global maxima) profiled. Values beneath each slice correspond to z coordinates in MNI space.

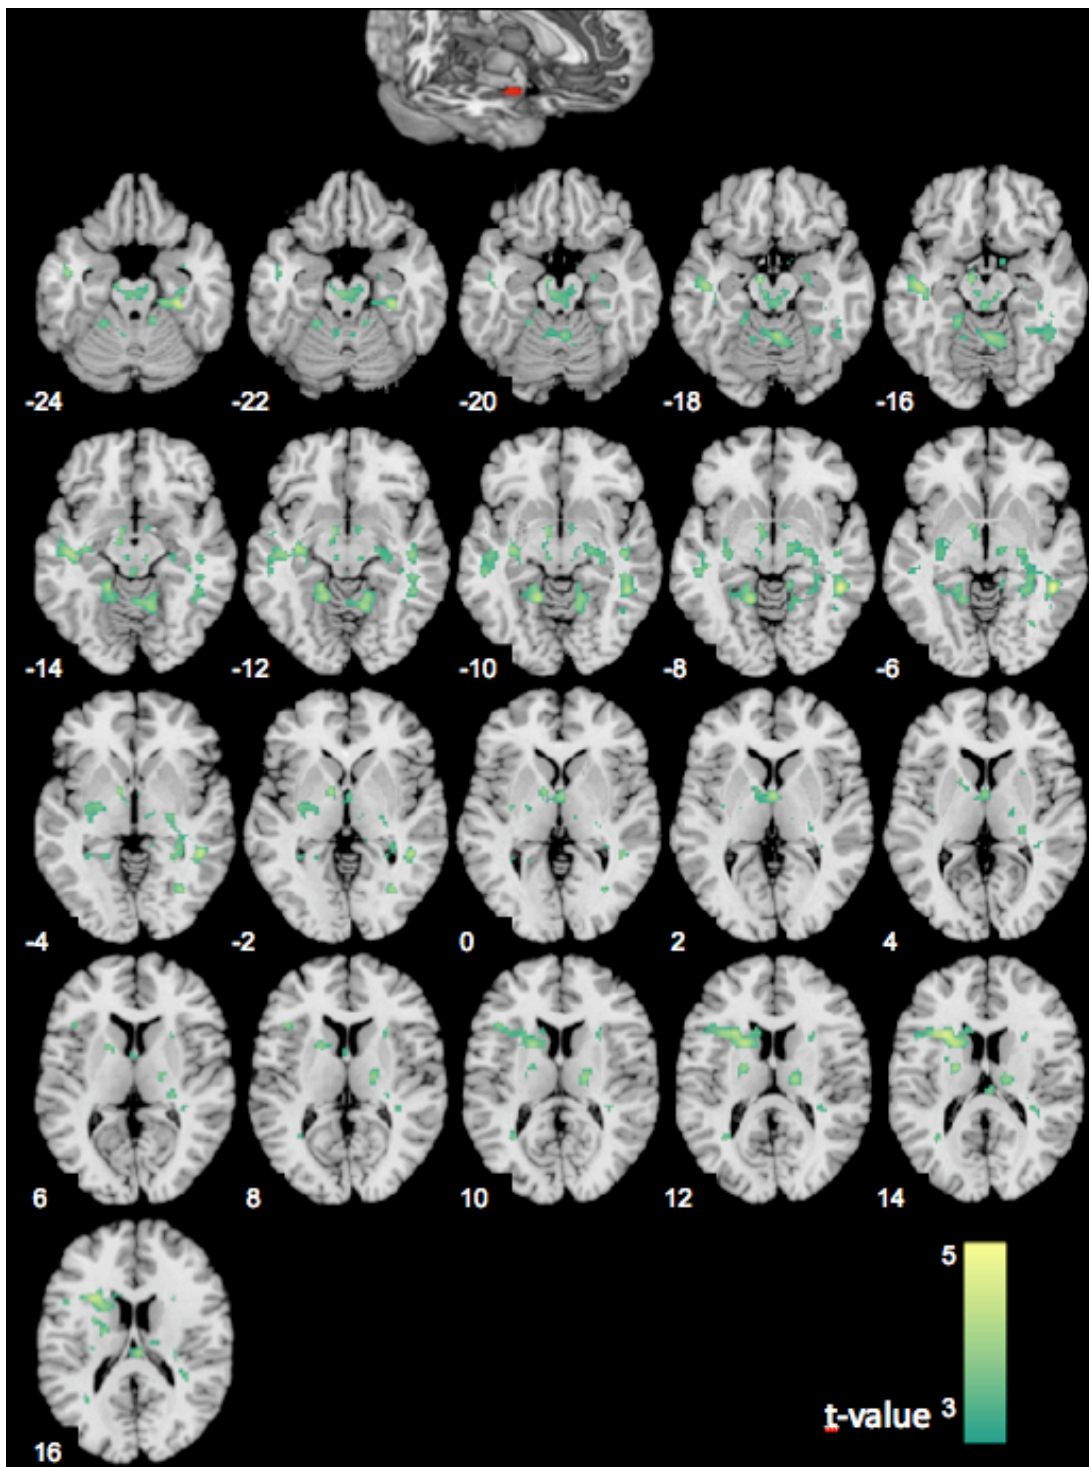

**Figure S6.** Whole-brain parametric map from a random-effects analysis profiling areas showing increased functional connectivity with an amygdala seed (shown at top). As in Figure S5, the map is displayed at an uncorrected threshold of  $P < 0.005$ , with a combined cluster extent threshold of  $k > 50$  voxels. [Table S4\(b\)](#) provides Brodmann areas, MNI coordinates, and  $t$ -values for voxels of peak connectivity (global maxima) profiled. Values beneath each slice correspond to  $z$  coordinates in MNI space.

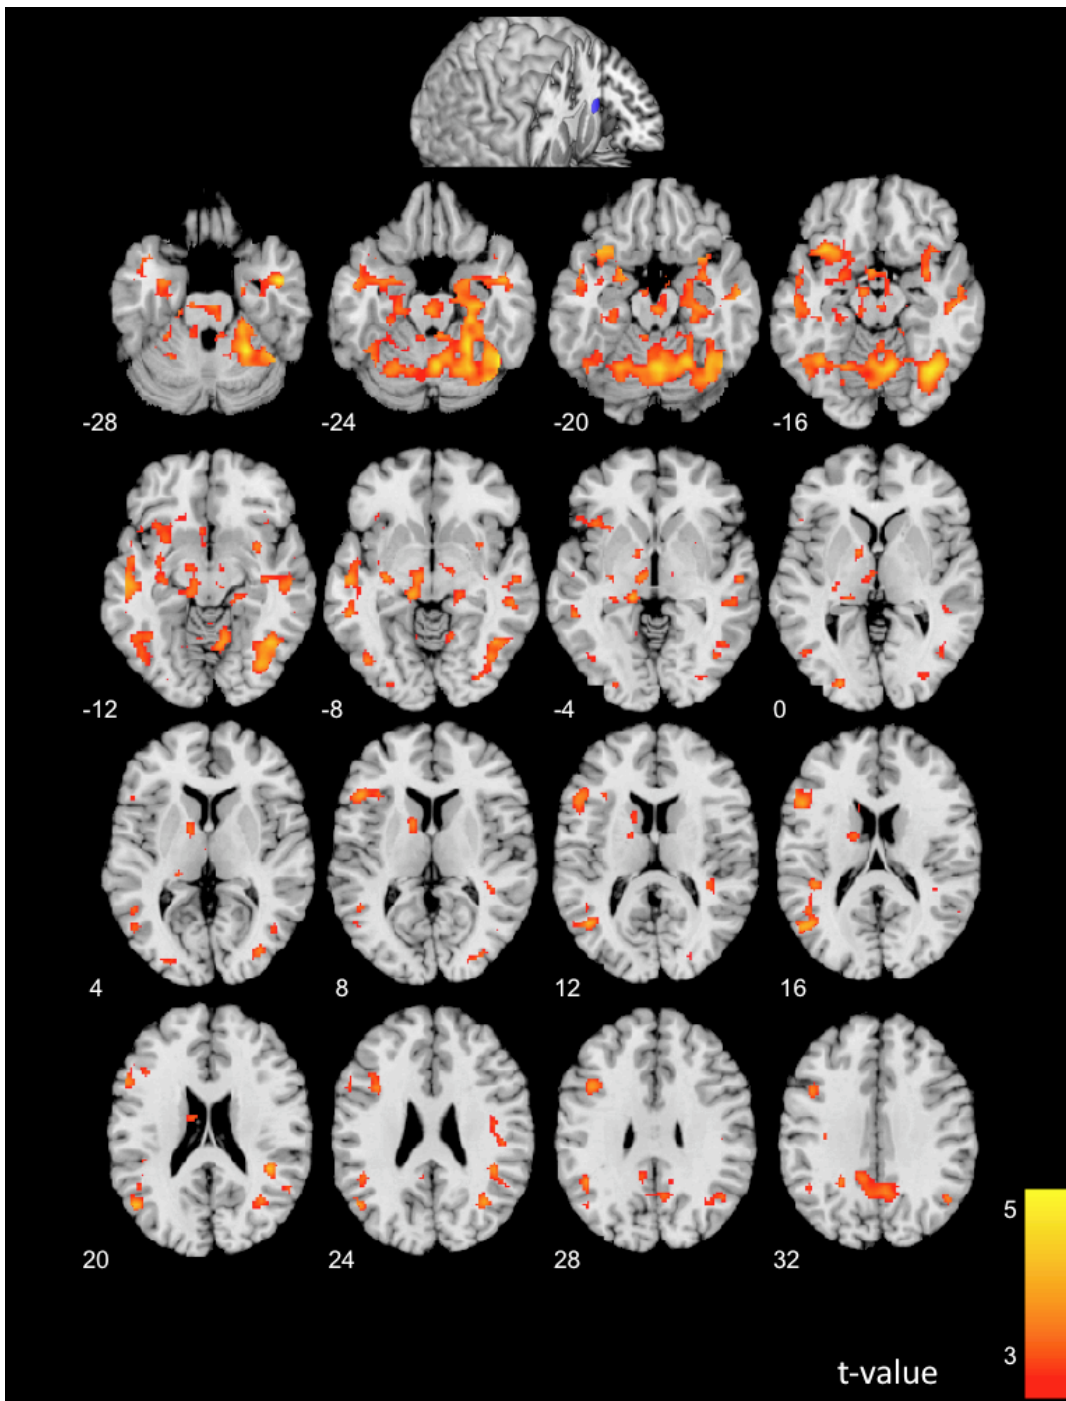

**Figure S7.** Whole-brain parametric map from a random-effects analysis profiling areas showing increased functional connectivity with a left anterior insula seed (shown at top). As in other supplemental figures for connectivity analyses, the map is displayed at a uncorrected threshold of  $P < 0.005$ , with a combined cluster extent threshold of  $k > 50$  voxels. [Table S4\(c\)](#) provides Brodmann areas, MNI coordinates, and  $t$ -values for voxels of peak connectivity (global maxima) profiled. Values beneath each slice correspond to  $z$  coordinates in MNI space.

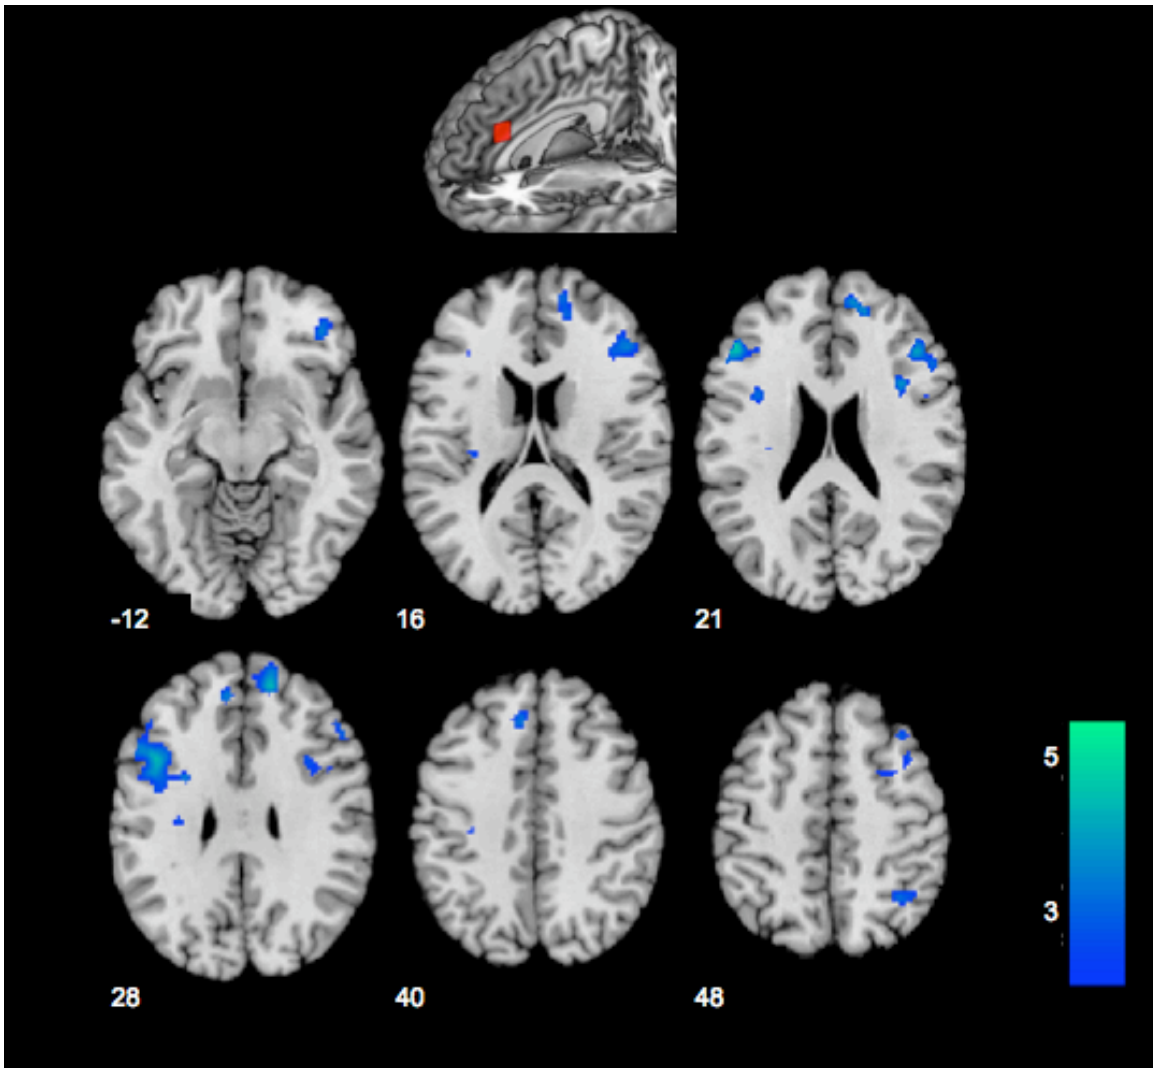

**Figure S8.** Whole-brain parametric map from a random-effects analysis profiling areas showing increased functional connectivity with a dorsal anterior cingulate seed (shown at top). As in other supplemental figures for connectivity analyses, the map is displayed at a uncorrected threshold of  $P < 0.005$ , with a combined cluster extent threshold of  $k > 50$  voxels. [Table S4\(d\)](#) provides Brodmann areas, MNI coordinates, and  $t$ -values for voxels of peak connectivity (global maxima) profiled. Values beneath each slice correspond to z coordinates in MNI space.
